# Supplementary material
Source: PubMed Central journal article supplement (PMC3674386)
Supplement: cr201342x1.pdf [file cr201342x1.pdf]

Figure. S1

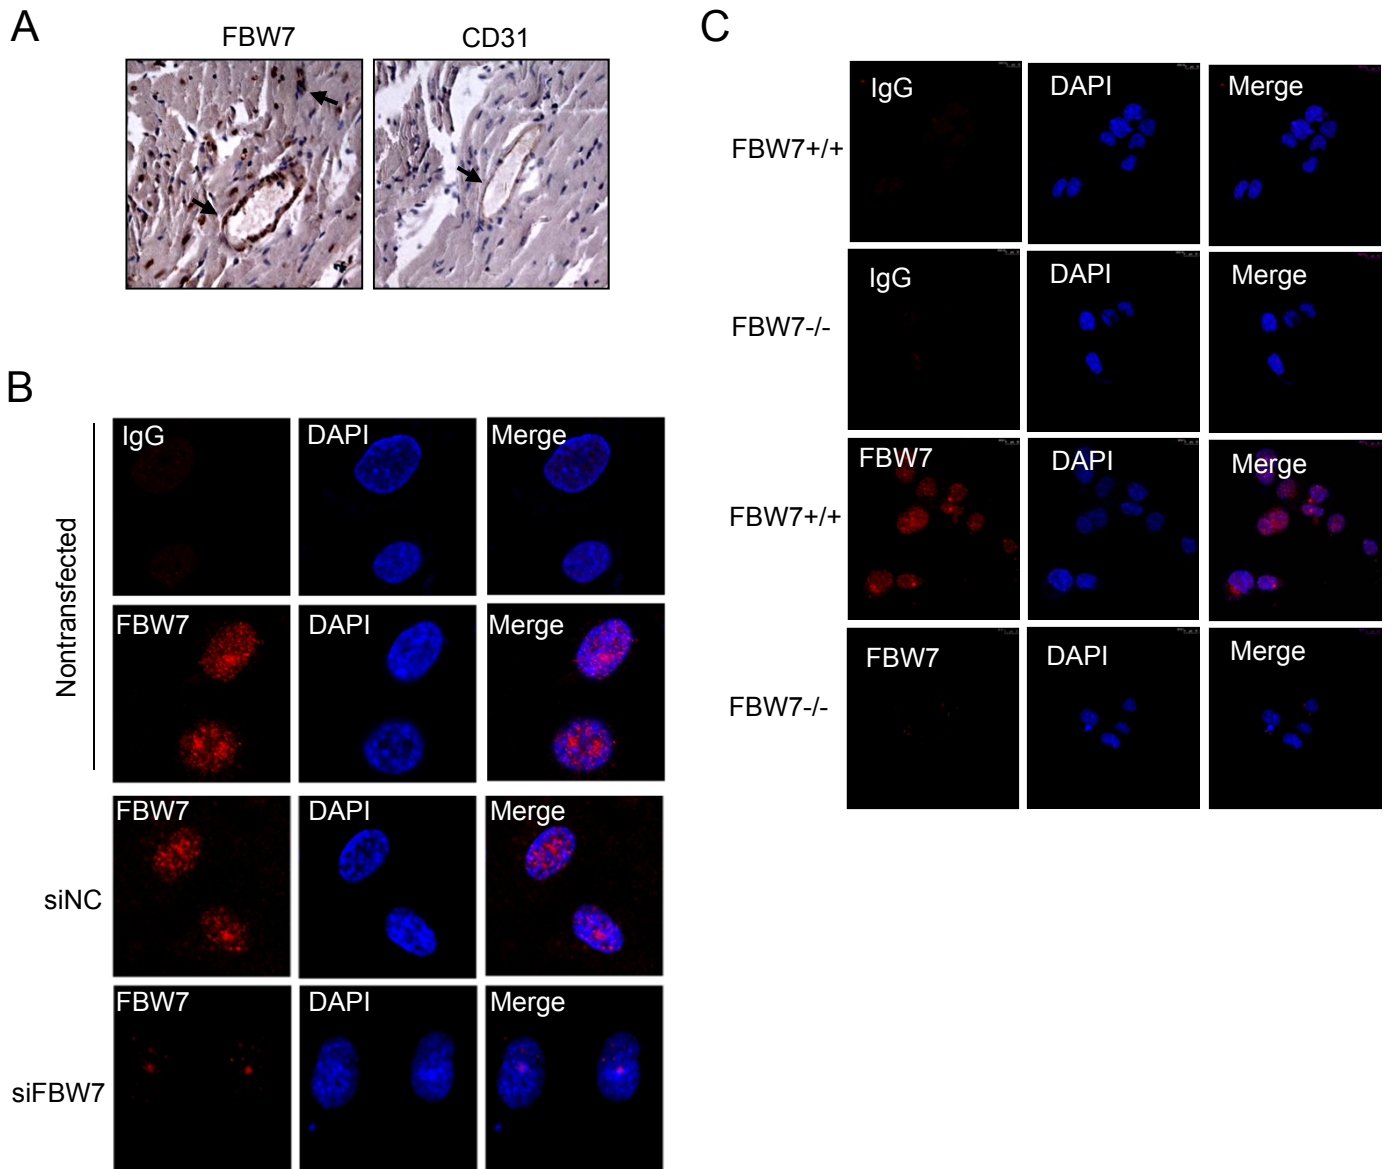

**Fig. S1. FBW7 expression in the vascular endothelium.** (A). Immunohistochemistry of FBW7 with a polyclonal antibody (brown) in mouse vascular sections. No signal was detected using a rabbit IgG control antibody (data not shown). Endothelial cells were stained using an anti-CD31 antibody. (B). Representative immunostaining is shown for the predominantly nuclear localization of FBW7 in HUVECs. (C). Immunostaining of FBW7 in wildtype or FBW7<sup>-/-</sup> DLD1 cells.
