# Supplementary material
Source: PubMed Central journal article supplement (PMC3674386)
Supplement: cr201342x4.pdf [file cr201342x4.pdf]

Figure. S4

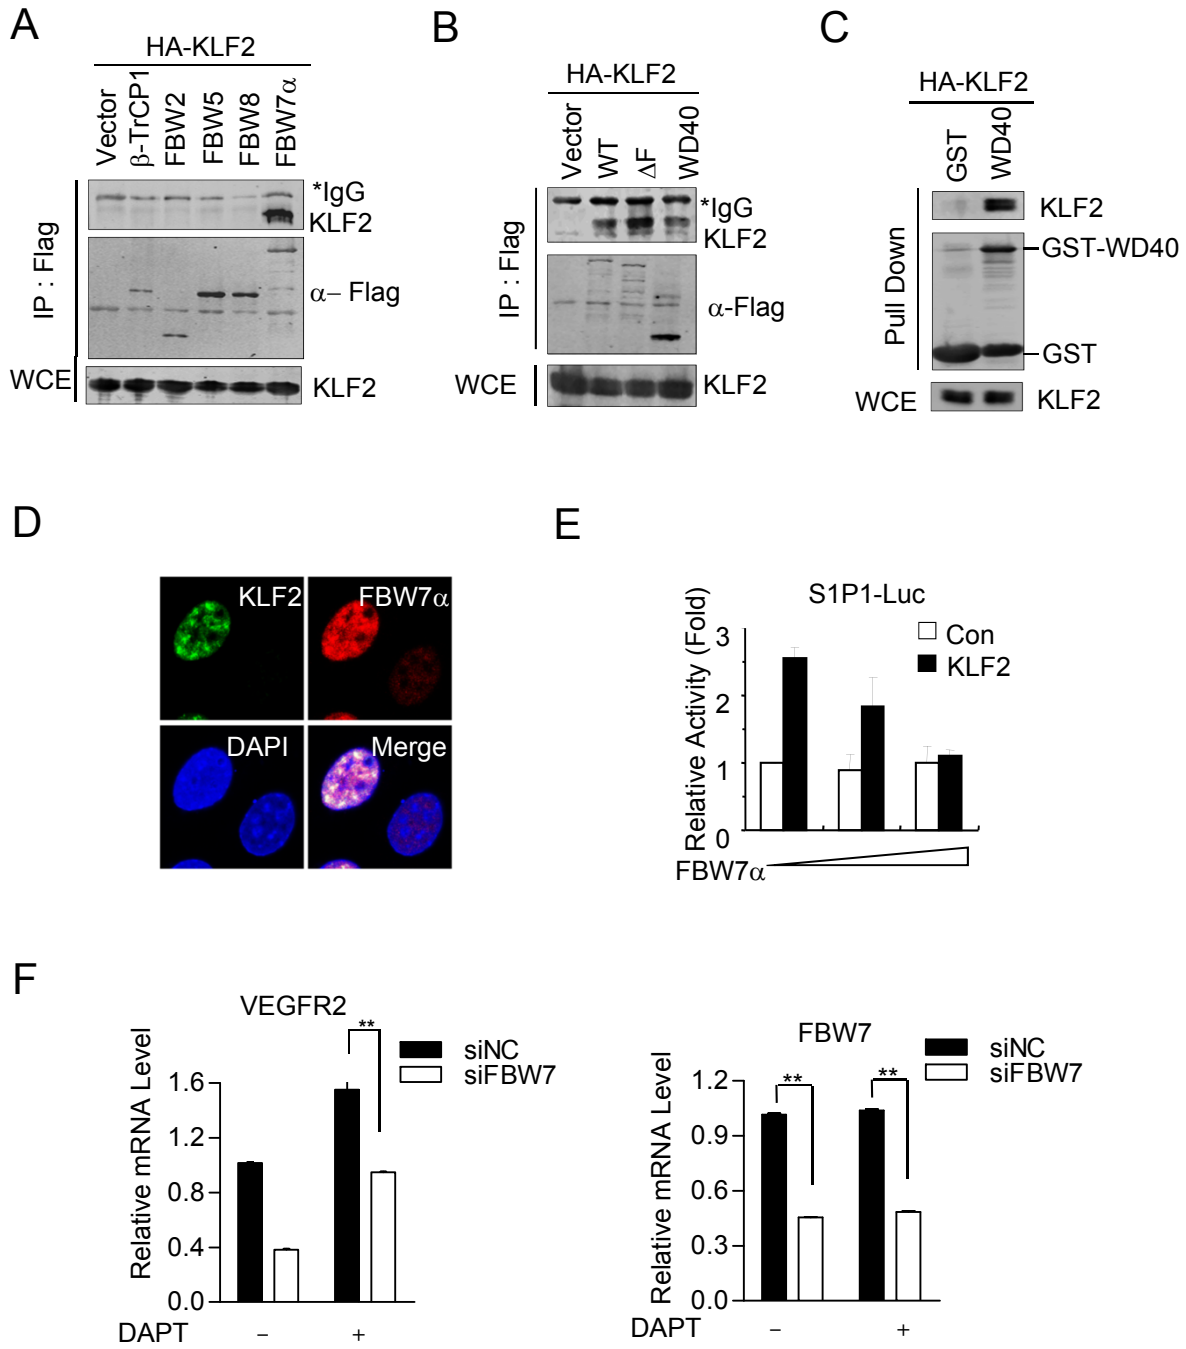

**Fig. S4. Interaction of KLF2 with FBW7.** (A). HA-KLF2 were transfected into 293T cells with empty vector,  $\beta$ -TrCP1, FBW2, FBW5, FBW8, or FBW7. Transfected cells were lysed after treatment with 10  $\mu$ M MG132 for 6 hours, immunoprecipitated with an anti-Flag antibody, and the immunoprecipitates (IP) and the original whole-cell extracts (WCE) were analyzed by Western blotting using an anti-HA or anti-Flag antibody. \*, IgG band. (B). Interaction of KLF2 with FBW7 deletion mutants. \*, IgG band. (C). Purified GST or GST-WD40 proteins were incubated with the cell lysates containing HA-KLF2. The products of GST pull-down were analyzed by Western blotting using anti-HA or anti-GST antibodies. (D). Colocalization of KLF2 and FBW7 in the nucleus. GFP-KLF2 and Flag-FBW7 $\alpha$  were co-expressed in 293T cells. Transfected cells were treated with MG132, fixed, and FBW7 was stained with an anti-Flag antibody. (E). FBW7 inhibited the KLF2 transcriptional activity. KLF2 was cotransfected with S1P1 promoter reporter gene in the presence of increasing amount FBW7. The activity was measured using a luciferase assay. (F). HUVECs transfected with control or FBW7 siRNA were treated with or without DAPT(10  $\mu$ M) for 24 hours, the expression levels of VEGFR2 and FBW7 mRNA were analyzed using qRT-PCR. \*\*, P < 0.01.
