# Supplementary material
Source: PubMed Central journal article supplement (PMC3674386)
Supplement: cr201342x5.pdf [file cr201342x5.pdf]

Figure. S5

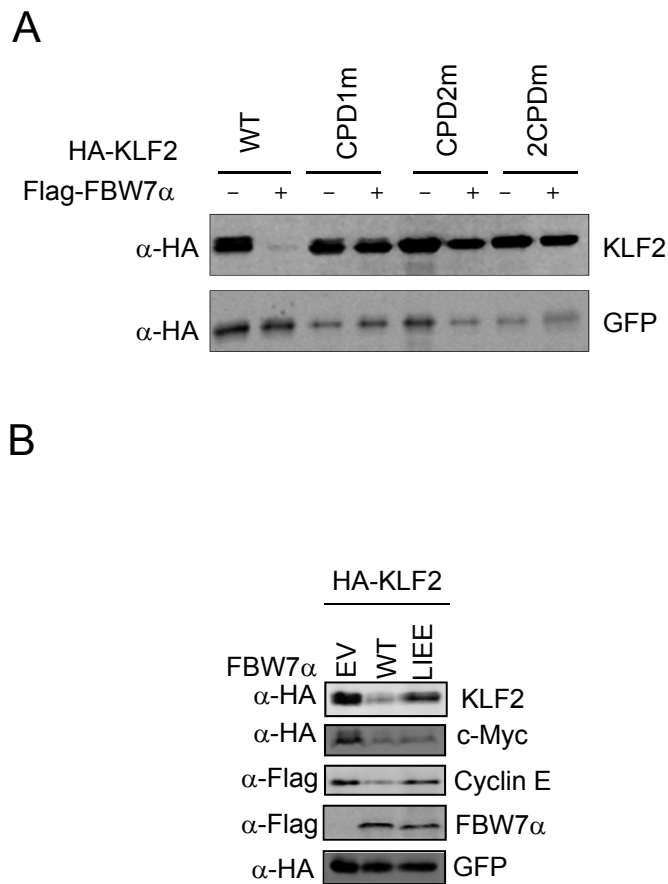

**Fig. S5. KLF2 contains two CPDs.** (A). Mutation of CPDs impaired FBW7-mediated degradation. Wild-type or CPD mutation KLF2 was coexpressed with FBW7 and the degradation of KLF2 was monitored using Western blotting. WT, wild-type; CPD1m, T171/S175A mutation; CPD2m, T243/S247A mutation; 2CPDm, T171/S175/T243/S247A mutation. (B). Dimerization of FBW7 is required for the degradation of KLF2. HA-Myc, Flag-Cyclin E, and HA-KLF2 was co-expressed with FBW7. The degradation was analyzed using Western blotting. EV, empty vector; LIEE, FBW7 L256E/I257E.
