# Supplementary material
Source: PubMed Central journal article supplement (PMC3674386)
Supplement: cr201342x6.pdf [file cr201342x6.pdf]

Figure. S6

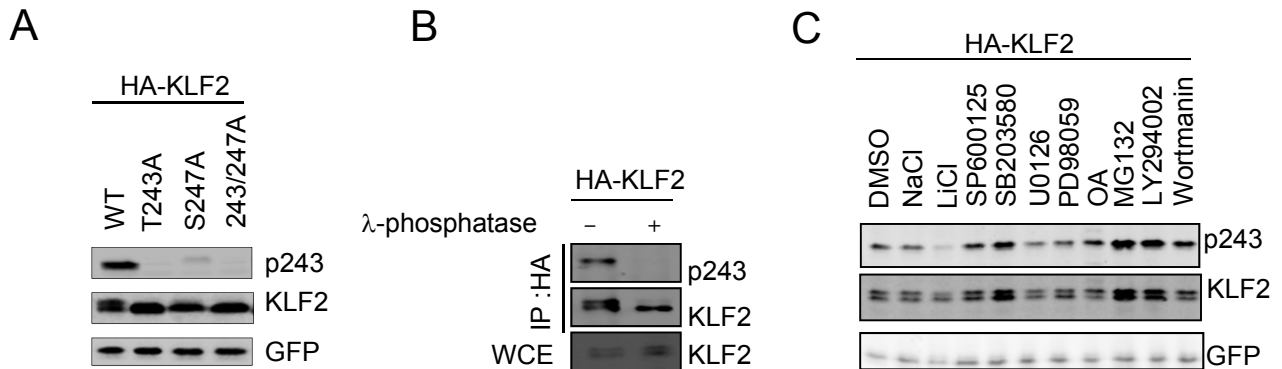

**D**

### Protein Information

Reference IPI00121423  
 Gene Symbol Klf2  
 Annotation Krueppel-like factor 2  
 Phosphorylated Peptides 2  
 Redundant Phospho-Peptides 2  
 Redundant Matches IPI00121423 [currently viewing]  
 IPI00896717 [site view]

Sequence  
 MALSEPI LPS FATFASPCER GLQERWPRNE PEAGGTDEDL NNVLDFILSM  
 GLDGLGAEN PEP PPQPPPP AFYYPEPGAP PPYSIPADSL GTELLRPDL D  
 PPQGPALHGR FLLAPPGR LV KAEPPEVDGG GYGCAPGLAH GPRGLKLEGA  
 PGATGACMRG PAGRPPPPPD TPPLSPDGPL RIPASGPRNP FPPFPGPGPS  
 FGGPGPALHY GPPAPGAFGL FEDAAAAAAA LGLAPPATRG LLTPSSPLE  
 LLEAKPKRGR RSWPRKRAAT HTCSYTNCGK TYTKSSHLKA HLRTHTGKQP  
 YHCNWECCGW KFARSDLTR HYRKHTGHRP FQCHLCDRAF SRSDHLALHM  
 KRHM

### Phosphorylation Sites Detail

Site Position: 171  
 Classification: Proline-Directed  
 Peptide: GPAGRPPPPDT\*PPLS\*PDGPLR  
 Motif Peptide: PPPPPDT\*PPLSPD  
 AScore: 1000.00  
 Precision: 0.99  
 Entropy: 1.996  
 MS/MS Spectrum: [Link](#)  
 Sequest outfile: [Link](#)

Tissue Spectral Count: Brownfat: 1  
 Heart: 1  
 Kidney: 2  
 Spleen: 5  
 Matching Proteins: IPI00121423 [currently viewing]  
 IPI00896717 [site view]

Site Position: 243  
 Classification: Proline-Directed  
 Peptide: GLLT\*PPS\*SPELLEAKPK  
 Motif Peptide: ATRGLLT\*PPSSPL  
 AScore: 54.60  
 Precision: 0.99  
 Entropy: 2.456  
 MS/MS Spectrum: [Link](#)  
 Sequest outfile: [Link](#)

Tissue Spectral Count: Brownfat: 4  
 Kidney: 3  
 Liver: 1  
 Lung: 2  
 Spleen: 6  
 Testis: 2  
 Matching Proteins: IPI00121423 [currently viewing]  
 IPI00896717 [site view]

**Fig. S6. Phosphorylation of KLF2 at T171 and T243.** (A). The anti-phospho-T243 KLF2 antibody recognized wild-type but not T243 mutated KLF2. Wild-type or mutant KLF2 was transfected into 293T cells and their expression was analyzed by Western blotting using both anti-phospho-T243 antibody and HA antibody. p243, phosphorylated T243 KLF2. (B). HA-KLF2 was expressed in 293T cells, immunoprecipitated and treated with or without  $\lambda$  protein phosphatase. (C). Screening of various kinase inhibitors for T243 phosphorylation. KLF2 was expressed in 293T cells. Cells were treated with kinase inhibitors as indicated for 6 hours. KLF2 was detected using an anti-phospho-T243 antibody or HA antibody. (D). The data from phosphomouse database indicated that KLF2 is phosphorylated at T171 and T243 in multiple mouse tissues. (<https://gygi.med.harvard.edu/phosphomouse>).
