# Supplementary material
Source: PubMed Central journal article supplement (PMC3674386)
Supplement: cr201342x7.pdf [file cr201342x7.pdf]

Figure. S7

A

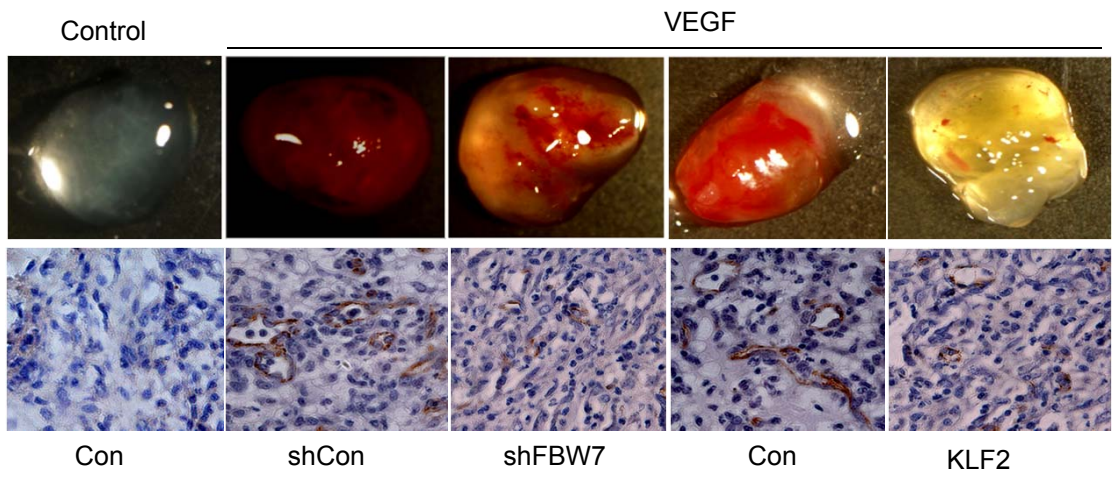

B

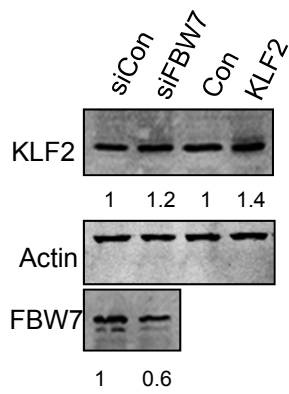

C

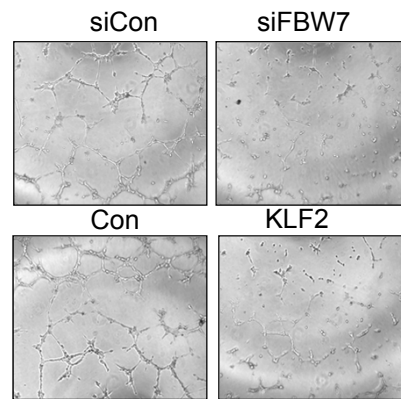

D

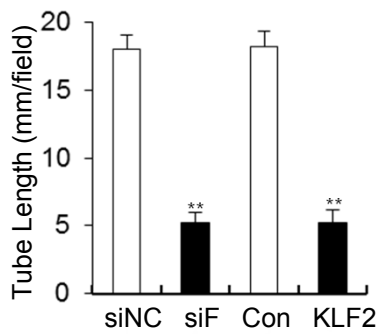

E

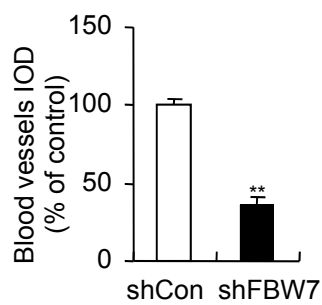

F

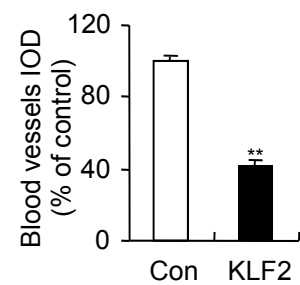

**Fig. S7. Overexpression of KLF2 had a similar effect on the angiogenesis to the FBW7 knockdown.**

(A). Overexpression of KLF2 had a similar effect on the angiogenesis to the FBW7 knockdown in a Matrigel-plug assay. (B). KLF2 and FBW7 were detected using Western blotting.  $\beta$ -actin indicates equal loading. The relative expression of FBW7 and KLF2 were normalized against the band intensity of corresponding to  $\beta$ -actin. Each relative intensity was calculated by comparison of the value for cells transfected with the control siRNA or control virus. The relative densitometric values are presented below the corresponding blots. (C and D). Both ectopic expression of KLF2 and FBW7 knockdown in HUVECs inhibited the tube formation. Columns, mean from three different experiments with duplicates; bars, standard deviation. (E and F). Experiments were performed as in A, and the blood vessels were measured. Data are the mean and standard error (n=3). IOD: Integrated Optical Density. \*\*, P<0.01.
