# Supplementary material
Source: PubMed Central journal article supplement (PMC3674386)
Supplement: cr201342x9.pdf [file cr201342x9.pdf]

Figure. S9

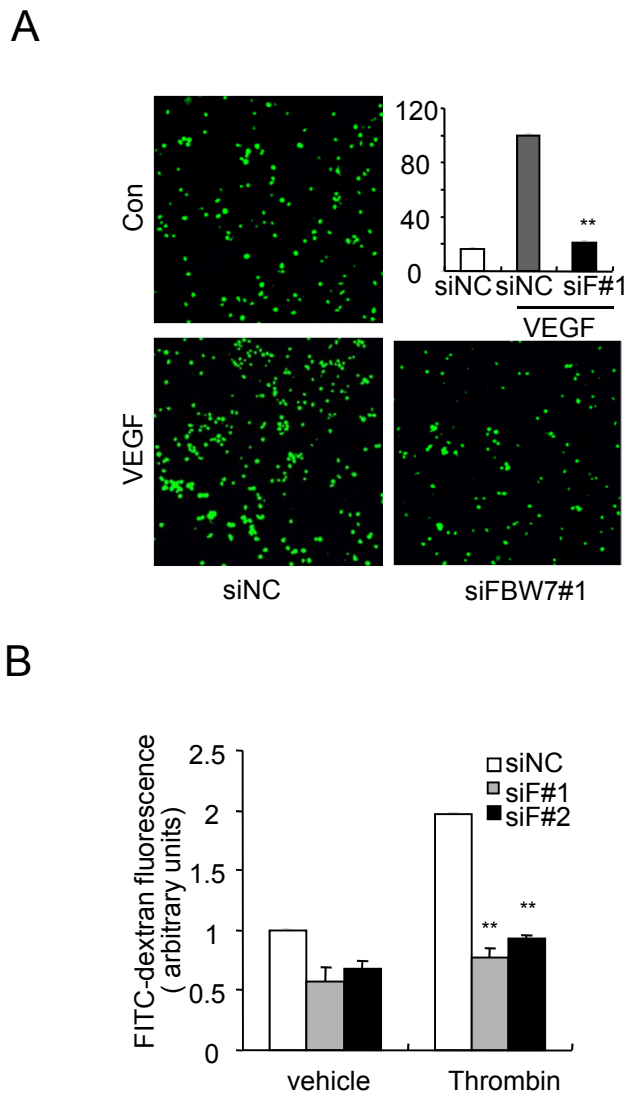

**Fig. S9. FBW7 knockdown in HUVECs reduced the leukocyte adhesion.** (A). HUVECs transfected with FBW7 or control siRNAs were seeded in a 24-well plate. The cells were starved in 1640 containing 1% FBS for 2 hours. Then the cells were pre-stimulated with vehicle (control) or 50 ng/ml VEGF (VEGF) for 4 hours. CFSE fluorescent dye-labeled U937 cells were allowed to adhere to the HUVEC monolayers for 90 min. After fixation, phase contrast and CFSE fluorescent (green) images were captured. Values are expressed as a percentage relative to that observed in the control siRNA transfected cells. (B). FBW7 knockdown decreased the endothelial leakage. FBW7 knockdown significantly attenuated the thrombin-mediated interendothelial gap formation.
