# Supplementary material
Source: PubMed Central journal article supplement (PMC3674386)
Supplement: cr201342x11.pdf [file cr201342x11.pdf]

Figure. S11

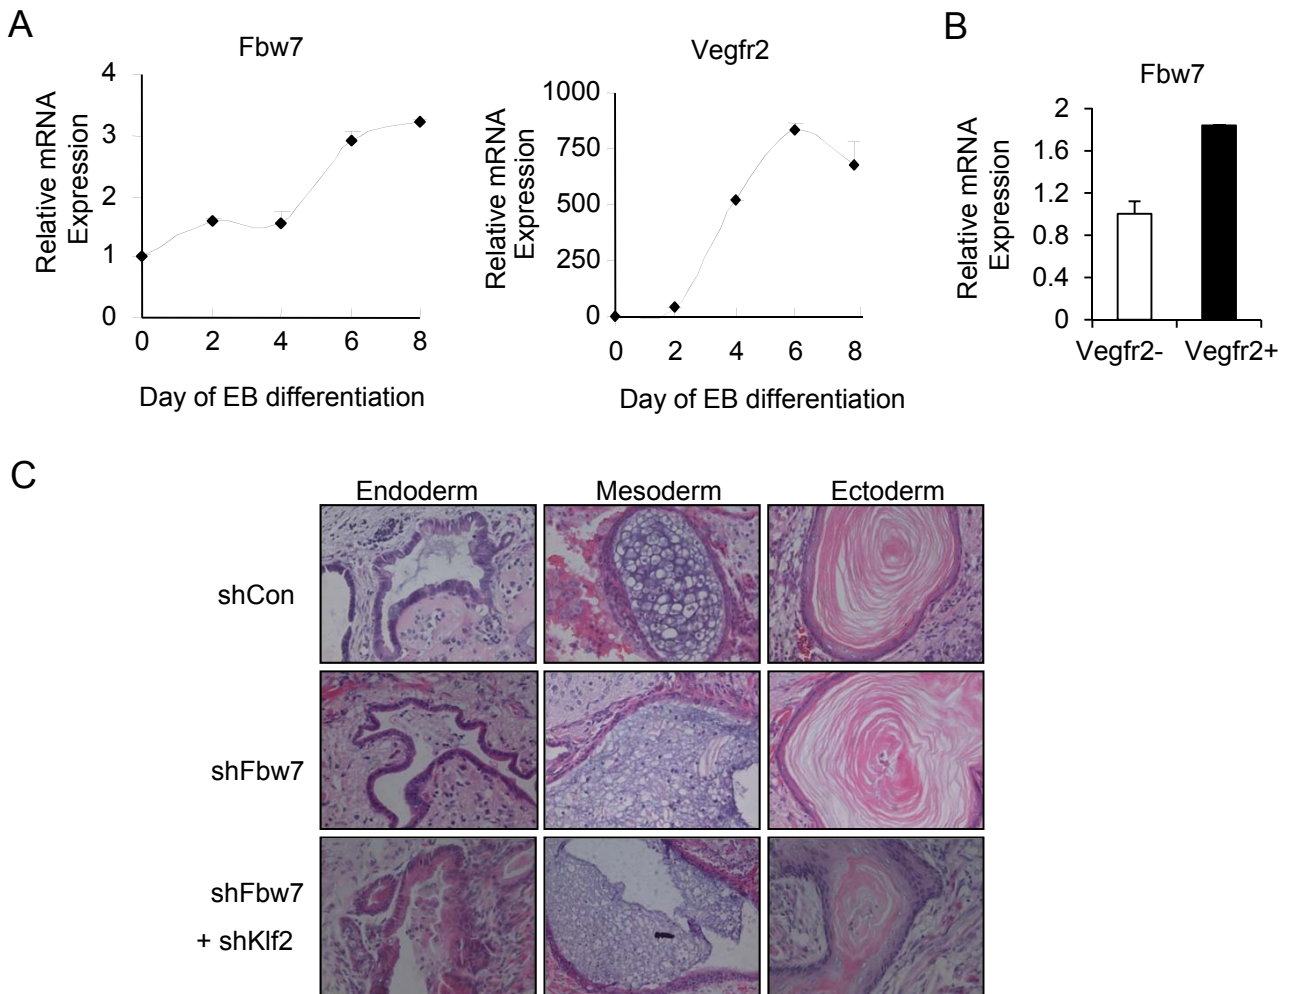

**Fig. S11 The expression of Fbw7 mRNA in Vegfr2-positive cells at day 6 of EB formation.** (A). The expression of Fbw7 and Vegfr2 mRNA were examined by qRT-PCR during embryoid bodies formation. (B). Fbw7 mRNA was expressed at higher level in Vegfr2 positive cells than in Vegfr2 negative cells. The Fbw7 mRNA was detected by qRT-PCR at day 6 in an EB differentiation model. (C). The effect of Fbw7 or Klf2 knockdown on the development of three germ layers.
