# Supplementary material
Source: PubMed Central journal article supplement (PMC3674386)
Supplement: cr201342x12.pdf [file cr201342x12.pdf]

Figure. S12

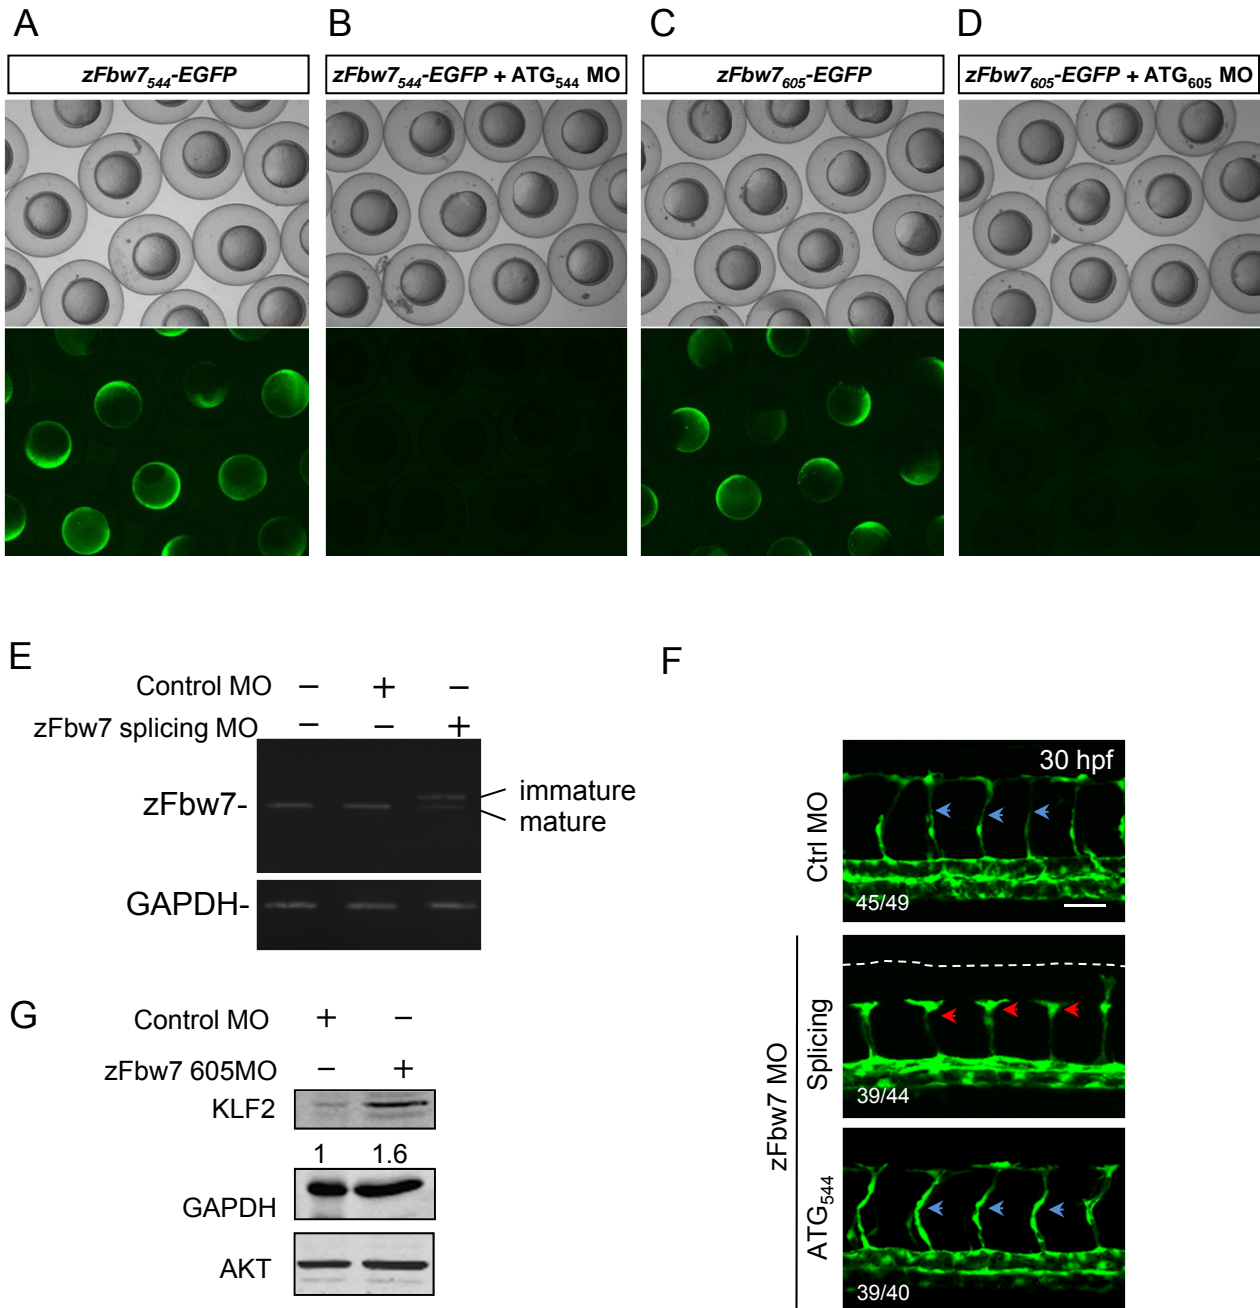

**Fig. S12 Knockdown of zFbw7 caused angiogenic defects in zebrafish.** (A-E) Validations on the efficacy of zFbw7 morpholinos. (F) Representative confocal microscopy images of the trunk of 30hpf Tg(*kdr*:EGFP) transgenic zebrafish embryos injected with morpholinos as indicated in the figure at 1-cell stage, linked to Fig. 7C. Blue Arrow (Full intersegmental vessel growth), Red Arrow (Defective intersegmental vessel growth). Scale bars = 50  $\mu$ m. (G) Regulation of zKlf2 proteins by zFbw7 in flk1-GFP positive endothelial cells. GFP positive endothelial cells were purified from Tg(*kdr*:EGFP) transgenic zebrafish embryos. The protein levels of Klf2 were analyzed using Western blotting. Quantification of KLF2 was normalized against the GAPDH. The relative densitometric values are presented below the corresponding blots.
